# Supplementary material for: Selection of Lactococcus lactis HY7803 for Glutamic Acid Production Based on Comparative Genomic Analysis
Source: PubMed Central journal article supplement (PMC9705870; doi:10.4014/jmb.2011.11022), 2020-12-31
Supplement: jmb-31-2-298-supple.pdf [file jmb-31-2-298-supple.pdf]

**Table S1. Predicted amino acids synthetic pathways in lactic acid bacteria.**

| Gene              | Other name(s)          | <i>Lh. brevis</i><br>ATCC 367 | <i>Lh. buchneri</i><br>CD034 | <i>Lh. casei</i><br>ATCC 393 | <i>Lh. curvatus</i><br>MRS6 | <i>Lh. fermentum</i><br>IFO 3956 | <i>Lh. plantarum</i><br>WCFS1            | <i>L. lactis</i><br>IL1403 | <i>Leu. mesenteroides</i><br>ATCC 8293 | KEGG ID                              | Enzyme full name                                                         |
|-------------------|------------------------|-------------------------------|------------------------------|------------------------------|-----------------------------|----------------------------------|------------------------------------------|----------------------------|----------------------------------------|--------------------------------------|--------------------------------------------------------------------------|
| <b>Histidine</b>  |                        |                               |                              |                              |                             |                                  |                                          |                            |                                        |                                      |                                                                          |
| <i>tktA tktB</i>  |                        | LVIS_RS18460                  |                              |                              |                             | LAF_RS09780                      | lp_0489<br>lp_1083<br>lp_3135<br>lp_3538 | L0043                      | LEUM_RS05705                           | K00615<br>K00615<br>K00615<br>K00615 | Transketolase<br>Transketolase<br>Transketolase<br>Transketolase         |
| <i>tktA tktB</i>  |                        | LVIS_RS13875                  | LBUCD034_RS08065             | LBCZ_RS12200                 | CG419_RS01975               | LAF_RS01120                      | lp_0471<br>lp_2166                       | L25614                     | LEUM_RS03400                           | K00948<br>K00948                     | Ribose-phosphate pyrophosphokinase<br>Ribose-phosphate pyrophosphokinase |
| <i>PRPS prsA</i>  |                        |                               | LBUCD034_RS03655             |                              |                             | LAF_RS04455                      | lp_2560                                  | L0066                      | LEUM_RS10520                           | K00765                               | ATP phosphoribosyltransferase                                            |
| <i>PRPS prsA</i>  |                        |                               | LBUCD034_RS03650             |                              |                             | LAF_RS04450                      |                                          | L0341                      | LEUM_RS10520                           | K02502                               | ATP phosphoribosyltransferase regulatory subunit                         |
| <i>hisG</i>       |                        |                               |                              |                              |                             |                                  |                                          |                            |                                        | K02502                               | ATP phosphoribosyltransferase regulatory subunit                         |
| <i>hisZ</i>       |                        |                               |                              |                              |                             |                                  | lp_2561                                  |                            | LEUM_RS07575                           | K01523                               | Phosphoribosyl-ATP pyrophosphohydrolase                                  |
| <i>hisZ</i>       |                        |                               | LBUCD034_RS03685             | LBCZ_RS06665                 |                             | LAF_RS04490                      | lp_2552                                  |                            |                                        |                                      | Phosphoribosyl-ATP pyrophosphohydrolase                                  |
| <i>hisE</i>       |                        |                               |                              | LBCZ_RS06670                 |                             |                                  |                                          |                            | L0072                                  | K11755                               | Phosphoribosyl-AMP cyclohydrolase                                        |
| <i>hisI</i>       |                        |                               | LBUCD034_RS03680             |                              |                             | LAF_RS04485                      | lp_2553                                  |                            | LEUM_RS07580                           | K01496                               | Phosphoribosyl-AMP cyclohydrolase                                        |
| <i>hisA</i>       |                        |                               | LBUCD034_RS03670             | LBCZ_RS06680                 |                             | LAF_RS04475                      | lp_2556                                  | L0070                      | LEUM_RS07590                           | K01814                               | Phosphoribosylformimino-5-aminoimidazole carboxamide ribotide isomerase  |
| <i>hisH</i>       |                        |                               | LBUCD034_RS03665             | LBCZ_RS06685                 |                             | LAF_RS04435                      | lp_2557                                  | L0069                      | LEUM_RS07595                           | K02501                               | Imidazole glycerol-phosphate synthase subunit HisH                       |
| <i>hisH</i>       |                        |                               |                              |                              |                             | LAF_RS04470                      |                                          |                            |                                        | K02501                               | Imidazole glycerol-phosphate synthase subunit HisH                       |
| <i>hisF</i>       |                        |                               | LBUCD034_RS03675             | LBCZ_RS06675                 |                             | LAF_RS04480                      | lp_2554                                  | L0071                      | LEUM_RS07585                           | K02500                               | Imidazole glycerol-phosphate synthase subunit HisF                       |
| <i>hisF</i>       |                        |                               |                              |                              |                             | LAF_RS04440                      |                                          |                            |                                        | K02500                               | Imidazole glycerol-phosphate synthase subunit HisF                       |
| <i>hisB</i>       |                        |                               | LBUCD034_RS03660             | LBCZ_RS06690                 |                             | LAF_RS04465                      | lp_2558                                  | L0068                      | LEUM_RS07600                           | K01693                               | Imidazoleglycerol-phosphate dehydratase                                  |
| <i>hisC</i>       |                        |                               | LBUCD034_RS03690             | LBCZ_RS06710                 | CG419_RS06545               | LAF_RS04495                      | lp_2551                                  | L0065                      | LEUM_RS07570                           | K00817                               | Histidinol-phosphate aminotransferase                                    |
| <i>hisC</i>       |                        |                               | LBUCD034_RS09100             |                              |                             |                                  |                                          |                            |                                        | K00817                               | Histidinol-phosphate aminotransferase                                    |
| -                 | histidinol-phosphatase |                               |                              | LBCZ_RS05625                 |                             | LAF_RS04445                      | lp_2563                                  | L37351                     | LEUM_RS07625                           | K04486                               | Histidinol-phosphatase (PHP family)                                      |
| <i>hisD</i>       |                        |                               | LBUCD034_RS03225             |                              |                             | LAF_RS04460                      | lp_2559                                  | L0067                      | LEUM_RS07605                           | K00013                               | Histidinol dehydrogenase                                                 |
| <b>Serine</b>     |                        |                               |                              |                              |                             |                                  |                                          |                            |                                        |                                      |                                                                          |
| <i>serA PHGDH</i> |                        | LVIS_RS12240                  | LBUCD034_RS00295             | LBCZ_RS06870                 | CG419_RS05575               | LAF_RS00915                      | lp_0203                                  | L0084                      | LEUM_RS02170                           | K00058                               | D-3-phosphoglycerate dehydrogenase / 2-oxoglutarate reductase            |
| <i>serA PHGDH</i> |                        | LVIS_RS19555                  | LBUCD034_RS00330             |                              |                             | LAF_RS04525                      | lp_2790                                  | L51032                     | LEUM_RS02455                           | K00058                               | D-3-phosphoglycerate dehydrogenase / 2-oxoglutarate reductase            |
| <i>serA PHGDH</i> |                        |                               | LBUCD034_RS01495             |                              |                             | LAF_RS05185                      |                                          |                            | LEUM_RS06020                           | K00058                               | D-3-phosphoglycerate dehydrogenase / 2-oxoglutarate reductase            |
| <i>serA PHGDH</i> |                        |                               | LBUCD034_RS04220             |                              |                             | LAF_RS10280                      |                                          |                            | LEUM_RS06435                           | K00058                               | D-3-phosphoglycerate dehydrogenase / 2-oxoglutarate reductase            |
| <i>serA PHGDH</i> |                        |                               | LBUCD034_RS08150             |                              |                             |                                  |                                          |                            | LEUM_RS07150                           | K00058                               | D-3-phosphoglycerate dehydrogenase / 2-oxoglutarate reductase            |
| <i>serA PHGDH</i> |                        |                               | LBUCD034_RS10685             |                              |                             |                                  |                                          |                            |                                        | K00058                               | D-3-phosphoglycerate dehydrogenase / 2-oxoglutarate reductase            |
| <i>serC PSAT1</i> |                        |                               | LBUCD034_RS01500             |                              |                             | LAF_RS04520                      | lp_0204                                  | L0083<br>L0085             | LEUM_RS07155                           | K00831<br>K01079                     | Phosphoserine aminotransferase<br>Phosphoserine phosphatase              |
| <i>serB PSPH</i>  |                        |                               |                              |                              |                             |                                  |                                          |                            |                                        | K01079                               | Phosphoserine phosphatase                                                |
| <b>Glycine</b>    |                        |                               |                              |                              |                             |                                  |                                          |                            |                                        |                                      |                                                                          |
| <i>serA PHGDH</i> |                        | LVIS_RS12240                  | LBUCD034_RS00295             | LBCZ_RS06870                 | CG419_RS05575               | LAF_RS00915                      | lp_0203                                  | L0084                      | LEUM_RS02170                           | K00058                               | D-3-phosphoglycerate dehydrogenase / 2-oxoglutarate reductase            |
| <i>serA PHGDH</i> |                        | LVIS_RS19555                  | LBUCD034_RS00330             |                              |                             | LAF_RS04525                      | lp_2790                                  | L51032                     | LEUM_RS02455                           | K00058                               | D-3-phosphoglycerate dehydrogenase / 2-oxoglutarate reductase            |
| <i>serA PHGDH</i> |                        |                               | LBUCD034_RS01495             |                              |                             | LAF_RS05185                      |                                          |                            | LEUM_RS06020                           | K00058                               | D-3-phosphoglycerate dehydrogenase / 2-oxoglutarate reductase            |
| <i>serA PHGDH</i> |                        |                               | LBUCD034_RS04220             |                              |                             | LAF_RS10280                      |                                          |                            | LEUM_RS06435                           | K00058                               | D-3-phosphoglycerate dehydrogenase / 2-oxoglutarate reductase            |
| <i>serA PHGDH</i> |                        |                               | LBUCD034_RS08150             |                              |                             |                                  |                                          |                            | LEUM_RS07150                           | K00058                               | D-3-phosphoglycerate dehydrogenase / 2-oxoglutarate reductase            |
| <i>serA PHGDH</i> |                        |                               | LBUCD034_RS10685             |                              |                             |                                  |                                          |                            |                                        | K00058                               | D-3-phosphoglycerate dehydrogenase / 2-oxoglutarate reductase            |
| <i>serC PSAT1</i> |                        |                               | LBUCD034_RS01500             |                              |                             | LAF_RS04520                      | lp_0204                                  | L0083<br>L0085             | LEUM_RS07155                           | K00831<br>K01079                     | Phosphoserine aminotransferase<br>Phosphoserine phosphatase              |
| <i>serB PSPH</i>  |                        |                               |                              |                              |                             |                                  |                                          |                            |                                        | K00600                               | Glycine hydroxymethyltransferase                                         |
| <i>glyA SHMT</i>  |                        | LVIS_RS17810                  | LBUCD034_RS01500             | LBCZ_RS05405                 | CG419_RS04760               | LAF_RS02470                      | lp_2375                                  | L0082                      | LEUM_RS03840                           | K00600                               | Glycine hydroxymethyltransferase                                         |
| <b>Threonine</b>  |                        |                               |                              |                              |                             |                                  |                                          |                            |                                        |                                      |                                                                          |
| <i>ppc</i>        |                        |                               | LBUCD034_RS04290             |                              |                             |                                  |                                          |                            | LEUM_RS08250                           | K01595                               | Phosphoenolpyruvate carboxylase                                          |
| <i>pckA</i>       |                        |                               |                              | LBCZ_RS08740                 |                             |                                  | lp_3418                                  |                            |                                        | K01610                               | Phosphoenolpyruvate carboxylase (ATP)                                    |
| <i>aspB</i>       |                        | LVIS_RS15700                  | LBUCD034_RS05885             | LBCZ_RS06920                 |                             | LAF_RS06085                      | lp_1739                                  | L0098                      |                                        | K00812                               | Aspartate aminotransferase                                               |
| <i>aspB</i>       |                        |                               |                              |                              |                             |                                  |                                          |                            |                                        | K00812                               | Aspartate aminotransferase                                               |
| <i>lysC</i>       |                        |                               | LBUCD034_RS10075             | LBCZ_RS00195                 |                             | LAF_RS04995                      | lp_0979                                  | L0097                      | LEUM_RS03820                           | K00928                               | Aspartate kinase                                                         |
| <i>lysC</i>       |                        |                               | LBUCD034_RS11660             | LBCZ_RS09995                 |                             | LAF_RS04995                      | lp_2308                                  |                            |                                        | K00928                               | Aspartate kinase                                                         |
| <i>asd</i>        |                        |                               | LBUCD034_RS10040             | LBCZ_RS00205                 |                             | LAF_RS05030                      | lp_1346                                  | L66199                     | LEUM_RS09445                           | K00133                               | Aspartate-semialdehyde dehydrogenase                                     |
| <i>hom</i>        |                        |                               | LBUCD034_RS11665             | LBCZ_RS09990                 |                             | LAF_RS04845                      | lp_0571                                  | L0090                      | LEUM_RS03830                           | K00003                               | Homoserine dehydrogenase                                                 |
| <i>thrB1</i>      |                        | LVIS_RS14215                  | LBUCD034_RS07540             | LBCZ_RS09980                 |                             | LAF_RS06570                      | lp_0572                                  | L0091                      | LEUM_RS03825                           | K00872                               | Homoserine kinase                                                        |
| <i>thrC</i>       |                        |                               | LBUCD034_RS11670             | LBCZ_RS09985                 |                             | LAF_RS06560                      | lp_2758                                  | L0092                      | LEUM_RS03835                           | K01733                               | Threonine synthase                                                       |
| <b>Cysteine</b>   |                        |                               |                              |                              |                             |                                  |                                          |                            |                                        |                                      |                                                                          |
| <i>serA PHGDH</i> |                        | LVIS_RS12240                  | LBUCD034_RS00295             | LBCZ_RS06870                 | CG419_RS05575               | LAF_RS00915                      | lp_0203                                  | L0084                      | LEUM_RS02170                           | K00058                               | D-3-phosphoglycerate dehydrogenase / 2-oxoglutarate reductase            |
| <i>serA PHGDH</i> |                        | LVIS_RS19555                  | LBUCD034_RS00330             |                              |                             | LAF_RS04525                      | lp_2790                                  | L51032                     | LEUM_RS02455                           | K00058                               | D-3-phosphoglycerate dehydrogenase / 2-oxoglutarate reductase            |

| Gene                                                                                                                                                                                                                                       | Other name(s)                                | <i>Lb. brevis</i><br>ATCC 367 | <i>Lb. buchneri</i><br>CD034 | <i>Lb. casei</i><br>ATCC 393   | <i>Lb. curvatus</i><br>MRS6 | <i>Lb. fermentum</i><br>IFO 3956         | <i>Lb. plantarum</i><br>WCFS1     | <i>L. lactis</i><br>IL1403 | <i>Leu. mesenteroides</i><br>ATCC 8293       | KEGG ID                                                                                                                                  | Enzyme full name                                                                                                                                                                                                                                                                                                                                                                                                                                                        |
|--------------------------------------------------------------------------------------------------------------------------------------------------------------------------------------------------------------------------------------------|----------------------------------------------|-------------------------------|------------------------------|--------------------------------|-----------------------------|------------------------------------------|-----------------------------------|----------------------------|----------------------------------------------|------------------------------------------------------------------------------------------------------------------------------------------|-------------------------------------------------------------------------------------------------------------------------------------------------------------------------------------------------------------------------------------------------------------------------------------------------------------------------------------------------------------------------------------------------------------------------------------------------------------------------|
| <i>serA PHGDH</i>                                                                                                                                                                                                                          |                                              |                               | LBUCD034_RS01495             |                                |                             | LAF_RS05185                              |                                   |                            | LEUM_RS06020                                 | K00058                                                                                                                                   | reductase<br>D-3-phosphoglycerate dehydrogenase /<br>2-oxoglutarate reductase                                                                                                                                                                                                                                                                                                                                                                                           |
| <i>serA PHGDH</i>                                                                                                                                                                                                                          |                                              |                               | LBUCD034_RS04220             |                                |                             | LAF_RS10280                              |                                   |                            | LEUM_RS06435                                 | K00058                                                                                                                                   | D-3-phosphoglycerate dehydrogenase /<br>2-oxoglutarate reductase                                                                                                                                                                                                                                                                                                                                                                                                        |
| <i>serA PHGDH</i>                                                                                                                                                                                                                          |                                              |                               | LBUCD034_RS08150             |                                |                             |                                          |                                   |                            | LEUM_RS07150                                 | K00058                                                                                                                                   | D-3-phosphoglycerate dehydrogenase /<br>2-oxoglutarate reductase                                                                                                                                                                                                                                                                                                                                                                                                        |
| <i>serA PHGDH</i>                                                                                                                                                                                                                          |                                              |                               | LBUCD034_RS10685             |                                |                             |                                          |                                   |                            |                                              | K00058                                                                                                                                   | D-3-phosphoglycerate dehydrogenase /<br>2-oxoglutarate reductase                                                                                                                                                                                                                                                                                                                                                                                                        |
| <i>serC PSAT1</i><br><i>serB PSPH</i><br><i>cysE</i><br><i>cysE</i><br><i>cysE</i><br><i>cysK</i><br><i>cysK</i><br><i>CBS</i><br><b>Methionine</b>                                                                                        |                                              |                               | LBUCD034_RS01500             |                                |                             | LAF_RS04520                              | lp_0204                           | L0083<br>L0085<br>L0087    | LEUM_RS07155                                 | K00831<br>K01079<br>K00640<br>K00640<br>K00640<br>K01738<br>K01738<br>K01697                                                             | Phosphoserine aminotransferase<br>Phosphoserine phosphatase<br>Serine O-acetyltransferase<br>Serine O-acetyltransferase<br>Serine O-acetyltransferase<br>Cysteine synthase<br>Cysteine synthase<br>Cystathionine beta-synthase                                                                                                                                                                                                                                          |
| <i>serA PHGDH</i>                                                                                                                                                                                                                          | LVIS_RS12240                                 | LBUCD034_RS00295              | LBCZ_RS06870                 | CG419_RS05575                  | LAF_RS00915                 | lp_0203                                  | L0084                             |                            | LEUM_RS02170                                 | K00058                                                                                                                                   | D-3-phosphoglycerate dehydrogenase /<br>2-oxoglutarate reductase                                                                                                                                                                                                                                                                                                                                                                                                        |
| <i>serA PHGDH</i>                                                                                                                                                                                                                          | LVIS_RS19555                                 | LBUCD034_RS00330              |                              |                                | LAF_RS04525                 | lp_2790                                  | L51032                            |                            | LEUM_RS02455                                 | K00058                                                                                                                                   | D-3-phosphoglycerate dehydrogenase /<br>2-oxoglutarate reductase                                                                                                                                                                                                                                                                                                                                                                                                        |
| <i>serA PHGDH</i>                                                                                                                                                                                                                          |                                              | LBUCD034_RS01495              |                              |                                | LAF_RS05185                 |                                          |                                   |                            | LEUM_RS06020                                 | K00058                                                                                                                                   | D-3-phosphoglycerate dehydrogenase /<br>2-oxoglutarate reductase                                                                                                                                                                                                                                                                                                                                                                                                        |
| <i>serA PHGDH</i>                                                                                                                                                                                                                          |                                              | LBUCD034_RS04220              |                              |                                | LAF_RS10280                 |                                          |                                   |                            | LEUM_RS06435                                 | K00058                                                                                                                                   | D-3-phosphoglycerate dehydrogenase /<br>2-oxoglutarate reductase                                                                                                                                                                                                                                                                                                                                                                                                        |
| <i>serA PHGDH</i>                                                                                                                                                                                                                          |                                              | LBUCD034_RS08150              |                              |                                |                             |                                          |                                   |                            | LEUM_RS07150                                 | K00058                                                                                                                                   | D-3-phosphoglycerate dehydrogenase /<br>2-oxoglutarate reductase                                                                                                                                                                                                                                                                                                                                                                                                        |
| <i>serA PHGDH</i>                                                                                                                                                                                                                          |                                              | LBUCD034_RS10685              |                              |                                |                             |                                          |                                   |                            |                                              | K00058                                                                                                                                   | D-3-phosphoglycerate dehydrogenase /<br>2-oxoglutarate reductase                                                                                                                                                                                                                                                                                                                                                                                                        |
| <i>serC PSAT1</i><br><i>serB PSPH</i><br><i>cysE</i><br><i>cysE</i><br><i>cysE</i><br><i>cysK</i><br><i>cysK</i><br><i>CBS</i><br><i>CTH</i><br><i>patB malY</i><br><i>patB malY</i><br><i>patB malY</i><br><i>mmuM</i><br><i>metH MTR</i> |                                              |                               | LBUCD034_RS01500             |                                |                             | LAF_RS04520                              | lp_0204                           | L0083<br>L0085<br>L0087    | LEUM_RS07155                                 | K00831<br>K01079<br>K00640<br>K00640<br>K00640<br>K01738<br>K01738<br>K01697<br>K01758<br>K14155<br>K14155<br>K14155<br>K00547<br>K00548 | Phosphoserine aminotransferase<br>Phosphoserine phosphatase<br>Serine O-acetyltransferase<br>Serine O-acetyltransferase<br>Serine O-acetyltransferase<br>Cysteine synthase<br>Cysteine synthase<br>Cystathionine beta-synthase<br>Cystathionine gamma-lyase<br>Cysteine-S-conjugate beta-lyase<br>Cysteine-S-conjugate beta-lyase<br>Cysteine-S-conjugate beta-lyase<br>Homocysteine S-methyltransferase<br>5-methyltetrahydrofolate--homocysteine<br>methyltransferase |
| <i>metE</i>                                                                                                                                                                                                                                | LVIS_RS12800                                 | LBUCD034_RS01745              | LBCZ_RS02080                 | CG419_RS03550<br>CG419_RS02850 | LAF_RS05465                 | lp_2751<br>lp_2888<br>lp_3517<br>lp_1298 | L0102<br>L177593                  |                            |                                              |                                                                                                                                          | 5-methyltetrahydropteroyltryglutamate--homocysteine<br>methyltransferase                                                                                                                                                                                                                                                                                                                                                                                                |
| <i>metE</i>                                                                                                                                                                                                                                |                                              | LBUCD034_RS11390              | LBCZ_RS02790                 |                                | LAF_RS09130                 | lp_1856                                  | L124252                           |                            | LEUM_RS08770                                 | K00549                                                                                                                                   | 5-methyltetrahydropteroyltryglutamate--homocysteine<br>methyltransferase                                                                                                                                                                                                                                                                                                                                                                                                |
| <i>metE</i>                                                                                                                                                                                                                                |                                              |                               |                              |                                |                             | lp_3283                                  |                                   |                            | LEUM_RS08780                                 | K00549                                                                                                                                   | 5-methyltetrahydropteroyltryglutamate--homocysteine<br>methyltransferase                                                                                                                                                                                                                                                                                                                                                                                                |
| <b>Alanine</b><br><i>alaA</i><br><i>alaA</i>                                                                                                                                                                                               |                                              |                               |                              |                                |                             |                                          |                                   | L162604<br>L38687          |                                              | K14260<br>K14260                                                                                                                         | Alanine-synthesizing transaminase<br>Alanine-synthesizing transaminase                                                                                                                                                                                                                                                                                                                                                                                                  |
| <b>Aspartate</b><br><i>ppc</i><br><i>pckA</i><br><i>aspB</i><br><i>aspB</i>                                                                                                                                                                |                                              |                               | LBUCD034_RS04290             | LBCZ_RS08740<br>LBCZ_RS06920   |                             | lp_3418<br>lp_1739                       |                                   |                            | LEUM_RS08250                                 | K01595<br>K01610<br>K00812<br>K00812                                                                                                     | Phosphoenolpyruvate carboxylase<br>Phosphoenolpyruvate carboxykinase (ATP)<br>Aspartate aminotransferase<br>Aspartate aminotransferase                                                                                                                                                                                                                                                                                                                                  |
| <b>Asparagine</b><br><i>ppc</i><br><i>pckA</i><br><i>aspB</i><br><i>aspB</i><br><i>asnB ASNS</i><br><i>asnB ASNS</i><br><i>asnB ASNS</i>                                                                                                   |                                              |                               | LBUCD034_RS04290             | LBCZ_RS08740<br>LBCZ_RS06920   |                             | lp_3418<br>lp_1739                       |                                   |                            | LEUM_RS08250                                 | K01595<br>K01610<br>K00812<br>K00812<br>K01953<br>K01953<br>K01953                                                                       | Phosphoenolpyruvate carboxylase<br>Phosphoenolpyruvate carboxykinase (ATP)<br>Aspartate aminotransferase<br>Aspartate aminotransferase<br>Asparagine synthase (glutamine-hydrolysing)<br>Asparagine synthase (glutamine-hydrolysing)<br>Asparagine synthase (glutamine-hydrolysing)                                                                                                                                                                                     |
| <b>Lysine</b><br><i>ppc</i><br><i>pckA</i><br><i>aspB</i><br><i>aspB</i><br><i>lysC</i><br><i>lysC</i><br><i>asd</i><br><i>dapA</i>                                                                                                        |                                              |                               | LBUCD034_RS04290             | LBCZ_RS08740<br>LBCZ_RS06920   |                             | lp_3418<br>lp_1739                       |                                   |                            | LEUM_RS08250                                 | K01595<br>K01610<br>K00812<br>K00812<br>K00928<br>K00928<br>K00133<br>K01714                                                             | Phosphoenolpyruvate carboxylase<br>Phosphoenolpyruvate carboxykinase (ATP)<br>Aspartate aminotransferase<br>Aspartate aminotransferase<br>Aspartate kinase<br>Aspartate kinase<br>Aspartate-semialdehyde dehydrogenase<br>4-hydroxy-tetrahydrodipicolinate synthase                                                                                                                                                                                                     |
|                                                                                                                                                                                                                                            | LVIS_RS15700                                 | LBUCD034_RS05885              | LBCZ_RS08740<br>LBCZ_RS06920 |                                | LAF_RS06085                 | lp_0979<br>lp_2308<br>lp_1346<br>lp_2685 | L0098<br>L0098<br>L66199<br>L0093 |                            | LEUM_RS03820<br>LEUM_RS09445<br>LEUM_RS03265 | K00928<br>K00928<br>K00133<br>K01714                                                                                                     | Aspartate kinase<br>Aspartate kinase<br>Aspartate-semialdehyde dehydrogenase<br>4-hydroxy-tetrahydrodipicolinate synthase                                                                                                                                                                                                                                                                                                                                               |
|                                                                                                                                                                                                                                            | LVIS_RS14280<br>LVIS_RS15030<br>LVIS_RS18860 | LBUCD034_RS06670              | LBCZ_RS10055                 | CG419_RS07250                  | LAF_RS03755<br>LAF_RS10455  | lp_0980<br>lp_3085                       | L00396<br>L0095                   |                            |                                              |                                                                                                                                          |                                                                                                                                                                                                                                                                                                                                                                                                                                                                         |
|                                                                                                                                                                                                                                            | LVIS_RS15700                                 | LBUCD034_RS05885              | LBCZ_RS08740<br>LBCZ_RS06920 |                                | LAF_RS06085                 | lp_3418<br>lp_1739                       | L0098                             |                            |                                              |                                                                                                                                          |                                                                                                                                                                                                                                                                                                                                                                                                                                                                         |

| Gene                  | Other name(s) | <i>Lb. brevis</i><br>ATCC 367 | <i>Lb. buchneri</i><br>CD034 | <i>Lb. casei</i><br>ATCC 393 | <i>Lb. curvatus</i><br>MRS6 | <i>Lb. fermentum</i><br>IFO 3956 | <i>Lb. plantarum</i><br>WCFS1 | <i>L. lactis</i><br>IL1403 | <i>Leu. mesenteroides</i><br>ATCC 8293 | KEGG ID | Enzyme full name                               |
|-----------------------|---------------|-------------------------------|------------------------------|------------------------------|-----------------------------|----------------------------------|-------------------------------|----------------------------|----------------------------------------|---------|------------------------------------------------|
| <i>dapB</i>           |               |                               | LBUCD034_RS10050             | LBCZ_RS00170                 |                             | LAF_RS05020                      | lp_1874                       | L0094                      | LEUM_RS03265                           | K00215  | 4-hydroxy-tetrahydrodipicolinate reductase     |
| <i>dapB</i>           |               |                               |                              |                              |                             |                                  |                               |                            |                                        | K00215  | 4-hydroxy-tetrahydrodipicolinate reductase     |
| <i>dapH dapD</i>      |               |                               | LBUCD034_RS10065             |                              |                             | LAF_RS05005                      |                               |                            |                                        | K05822  | Tetrahydrodipicolinate N-acetyltransferase     |
| <i>patA</i>           |               |                               | LBUCD034_RS00995             | LBCZ_RS03615                 |                             | LAF_RS00160                      | lp_2684                       | L56488                     | LEUM_RS06015                           | K00841  | Aminotransferase                               |
| <i>patA</i>           |               |                               | LBUCD034_RS01545             |                              |                             | LAF_RS00730                      |                               |                            | LEUM_RS06600                           | K00841  | Aminotransferase                               |
| <i>patA</i>           |               |                               | LBUCD034_RS10045             |                              |                             | LAF_RS05025                      |                               |                            | LEUM_RS06720                           | K00841  | Aminotransferase                               |
| <i>patA</i>           |               |                               |                              |                              |                             |                                  |                               |                            | LEUM_RS08960                           | K00841  | Aminotransferase                               |
| <i>dapL</i>           |               |                               | LBUCD034_RS10060             |                              |                             | LAF_RS05010                      | lp_2263                       | L80177                     | LEUM_RS03260                           | K05823  | N-acetyldiaminopimelate deacetylase            |
| <i>dapF</i>           |               |                               | LBUCD034_RS10080             | LBCZ_RS00200                 |                             | LAF_RS04990                      | lp_2185                       |                            |                                        | K01778  | Diaminopimelate epimerase                      |
| <i>lysA</i>           |               |                               | LBUCD034_RS10070             | LBCZ_RS00190                 |                             | LAF_RS05000                      | lp_1713                       | L0121                      | LEUM_RS03250                           | K01586  | Diaminopimelate decarboxylase                  |
| <b>Tryptophan</b>     |               |                               |                              |                              |                             |                                  |                               |                            |                                        |         |                                                |
| <i>aroF aroG aroH</i> |               |                               |                              |                              |                             |                                  |                               | L0063                      |                                        | K01626  | 3-deoxy-7-phosphoheptulonate synthase          |
| <i>aroF aroG aroH</i> |               |                               |                              |                              |                             |                                  |                               | L0064                      |                                        | K01626  | 3-deoxy-7-phosphoheptulonate synthase          |
| <i>ARO12 aroA</i>     |               |                               | LBUCD034_RS11855             |                              | CG419_RS05415               |                                  | lp_1085                       |                            | LEUM_RS05695                           | K03856  | 3-deoxy-7-phosphoheptulonate synthase          |
| <i>aroB</i>           |               |                               | LBUCD034_RS11850             |                              | CG419_RS05420               |                                  | lp_1086                       | L0060                      | LEUM_RS05690                           | K01735  | 3-dehydroquininate synthase                    |
| <i>aroKB</i>          |               |                               |                              |                              |                             |                                  |                               |                            |                                        | K13829  | Shikimate kinase / 3-dehydroquininate synthase |
| <i>aroD</i>           |               |                               | LBUCD034_RS01315             |                              | CG419_RS05380               |                                  | lp_3493                       | L0062                      | LEUM_RS05660                           | K03785  | 3-dehydroquininate dehydratase I               |
| <i>aroE</i>           |               |                               | LBUCD034_RS01360             | LBCZ_RS01660                 | CG419_RS05410               |                                  | lp_3494                       | L0061                      | LEUM_RS05700                           | K00014  | Shikimate dehydrogenase                        |
| <i>aroE</i>           |               |                               |                              | LBCZ_RS01670                 |                             |                                  | lp_3499                       |                            |                                        | K00014  | Shikimate dehydrogenase                        |
| <i>aroE</i>           |               |                               |                              |                              |                             |                                  | lp_3499                       |                            |                                        | K00014  | Shikimate dehydrogenase                        |
| <i>aroK aroL</i>      |               |                               | LBUCD034_RS01355             |                              | CG419_RS05425               | LAF_RS06345                      | lp_2033                       | L0056                      | LEUM_RS05670                           | K00891  | Shikimate kinase                               |
| <i>aroA</i>           |               |                               | LBUCD034_RS01345             |                              |                             | LAF_RS06355                      | lp_2035                       | L0057                      | LEUM_RS05680                           | K00800  | 3-phosphoshikimate 1-carboxyvinyltransferase   |
| <i>aroC</i>           |               |                               | LBUCD034_RS01340             |                              |                             | LAF_RS06365                      | lp_2037                       | L0059                      | LEUM_RS05685                           | K01736  | Chorismate synthase                            |
| <i>trpE</i>           |               |                               | LBUCD034_RS11860             |                              |                             |                                  | lp_1652                       | L0054                      | LEUM_RS05715                           | K01657  | Anthranilate synthase component I              |
| <i>trpG</i>           |               |                               | LBUCD034_RS11865             |                              |                             |                                  | lp_1718                       | L0178                      | LEUM_RS05710                           | K01658  | Anthranilate synthase component II             |
| <i>trpD</i>           |               |                               | LBUCD034_RS11195             |                              |                             |                                  | lp_1654                       | L0052                      | LEUM_RS05735                           | K00766  | Anthranilate phosphoribosyltransferase         |
| <i>trpF</i>           |               |                               | LBUCD034_RS11205             |                              |                             |                                  | lp_1656                       | L0050                      | LEUM_RS05725                           | K01817  | Phosphoribosylanthranilate isomerase           |
| <i>trpF</i>           |               |                               |                              |                              |                             |                                  |                               |                            | LEUM_RS09800                           | K01817  | Phosphoribosylanthranilate isomerase           |
| <i>trpC</i>           |               |                               | LBUCD034_RS11200             |                              |                             |                                  | lp_1655                       | L0051                      | LEUM_RS05730                           | K01609  | Indole-3-glycerol phosphate synthase           |
| <i>trpA</i>           |               |                               | LBUCD034_RS11215             |                              |                             |                                  | lp_1658                       | L0048                      | LEUM_RS05720                           | K01695  | Tryptophan synthase alpha chain                |
| <i>trpB</i>           |               |                               | LBUCD034_RS11210             |                              |                             |                                  | lp_1657                       | L0049                      | LEUM_RS05740                           | K01696  | Tryptophan synthase beta chain                 |
| <b>Phenylalanine</b>  |               |                               |                              |                              |                             |                                  |                               |                            |                                        |         |                                                |
| <i>aroF aroG aroH</i> |               |                               |                              |                              |                             |                                  |                               | L0063                      |                                        | K01626  | 3-deoxy-7-phosphoheptulonate synthase          |
| <i>aroF aroG aroH</i> |               |                               |                              |                              |                             |                                  |                               | L0064                      |                                        | K01626  | 3-deoxy-7-phosphoheptulonate synthase          |
| <i>ARO12 aroA</i>     |               |                               | LBUCD034_RS11855             |                              | CG419_RS05415               |                                  | lp_1085                       |                            | LEUM_RS05695                           | K03856  | 3-deoxy-7-phosphoheptulonate synthase          |
| <i>aroB</i>           |               |                               | LBUCD034_RS11850             |                              | CG419_RS05420               |                                  | lp_1086                       | L0060                      | LEUM_RS05690                           | K01735  | 3-dehydroquininate synthase                    |
| <i>aroD</i>           |               |                               | LBUCD034_RS01315             |                              | CG419_RS05380               |                                  | lp_3493                       | L0062                      | LEUM_RS05660                           | K03785  | 3-dehydroquininate dehydratase I               |
| <i>aroE</i>           |               |                               | LBUCD034_RS01360             | LBCZ_RS01660                 | CG419_RS05410               |                                  | lp_3494                       | L0061                      | LEUM_RS05700                           | K00014  | Shikimate dehydrogenase                        |
| <i>aroE</i>           |               |                               |                              | LBCZ_RS01670                 |                             |                                  | lp_3498                       |                            |                                        | K00014  | Shikimate dehydrogenase                        |
| <i>aroE</i>           |               |                               |                              |                              |                             |                                  | lp_3499                       |                            |                                        | K00014  | Shikimate dehydrogenase                        |
| <i>aroK aroL</i>      |               |                               | LBUCD034_RS01355             |                              | CG419_RS05425               | LAF_RS06345                      | lp_2033                       | L0056                      | LEUM_RS05670                           | K00891  | Shikimate kinase                               |
| <i>aroA</i>           |               |                               | LBUCD034_RS01345             |                              |                             | LAF_RS06355                      | lp_2035                       | L0057                      | LEUM_RS05680                           | K00800  | 3-phosphoshikimate 1-carboxyvinyltransferase   |
| <i>aroC</i>           |               |                               | LBUCD034_RS01340             |                              |                             | LAF_RS06365                      | lp_2037                       | L0059                      | LEUM_RS05685                           | K01736  | Chorismate synthase                            |
| <i>pheA</i>           |               |                               |                              |                              |                             | LAF_RS06370                      |                               |                            |                                        | K14170  | Chorismate mutase / prephenate dehydratase     |
| <i>ARO11 aroA</i>     |               |                               | LBUCD034_RS01335             |                              | CG419_RS01860               |                                  |                               | L64445                     |                                        | K04516  | Chorismate mutase                              |
| <i>pheB</i>           |               |                               | LBUCD034_RS11680             |                              |                             |                                  |                               |                            |                                        | K06209  | Chorismate mutase                              |
| <i>pheA2</i>          |               |                               | LBUCD034_RS01065             |                              |                             |                                  |                               |                            |                                        | K04518  | Prephenate dehydratase                         |
| <i>pheA</i>           |               |                               |                              |                              |                             |                                  |                               |                            |                                        | K14170  | Chorismate mutase / prephenate dehydratase     |
| <i>aspB</i>           |               |                               |                              |                              |                             | LAF_RS06370                      |                               |                            |                                        | K04518  | Prephenate dehydratase                         |
| <i>aspB</i>           |               | LVIS_RS15700                  | LBUCD034_RS05885             | LBCZ_RS06920                 |                             | LAF_RS06085                      | lp_1739                       | L0098                      |                                        | K00812  | Aspartate aminotransferase                     |
| <i>hisC</i>           |               |                               |                              |                              |                             |                                  |                               |                            |                                        | K00812  | Aspartate aminotransferase                     |
| <i>tyrB</i>           |               |                               | LBUCD034_RS03690             | LBCZ_RS06660                 | CG419_RS06545               | LAF_RS04495                      | lp_2551                       | L0065                      | LEUM_RS07570                           | K00817  | Histidinol-phosphate aminotransferase          |
| <i>tyrB</i>           |               |                               |                              | LBCZ_RS10030                 |                             |                                  |                               |                            |                                        | K00832  | Aromatic-amino-acid transaminase               |
| <b>Tyrosine</b>       |               |                               |                              |                              |                             |                                  |                               |                            |                                        |         |                                                |
| <i>aroF aroG aroH</i> |               |                               |                              |                              |                             |                                  |                               | L0063                      |                                        | K01626  | 3-deoxy-7-phosphoheptulonate synthase          |
| <i>aroF aroG aroH</i> |               |                               |                              |                              |                             |                                  |                               | L0064                      |                                        | K01626  | 3-deoxy-7-phosphoheptulonate synthase          |
| <i>ARO12 aroA</i>     |               |                               | LBUCD034_RS11855             |                              | CG419_RS05415               |                                  | lp_1085                       |                            | LEUM_RS05695                           | K03856  | 3-deoxy-7-phosphoheptulonate synthase          |
| <i>aroB</i>           |               |                               | LBUCD034_RS11850             |                              | CG419_RS05420               |                                  | lp_1086                       | L0060                      | LEUM_RS05690                           | K01735  | 3-dehydroquininate synthase                    |
| <i>aroD</i>           |               |                               | LBUCD034_RS01315             |                              | CG419_RS05380               |                                  | lp_3493                       | L0062                      | LEUM_RS05660                           | K03785  | 3-dehydroquininate dehydratase I               |
| <i>aroE</i>           |               |                               | LBUCD034_RS01360             | LBCZ_RS01660                 | CG419_RS05410               |                                  | lp_3494                       | L0061                      | LEUM_RS05700                           | K00014  | Shikimate dehydrogenase                        |
| <i>aroE</i>           |               |                               |                              | LBCZ_RS01670                 |                             |                                  | lp_3498                       |                            |                                        | K00014  | Shikimate dehydrogenase                        |
| <i>aroE</i>           |               |                               |                              |                              |                             |                                  | lp_3499                       |                            |                                        | K00014  | Shikimate dehydrogenase                        |
| <i>aroK aroL</i>      |               |                               | LBUCD034_RS01355             |                              | CG419_RS05425               | LAF_RS06345                      | lp_2033                       | L0056                      | LEUM_RS05670                           | K00891  | Shikimate kinase                               |
| <i>aroKB</i>          |               |                               |                              |                              |                             |                                  |                               |                            |                                        | K13829  | Shikimate kinase / 3-dehydroquininate synthase |
| <i>aroA</i>           |               |                               | LBUCD034_RS01345             |                              |                             | LAF_RS06355                      | lp_2035                       | L0057                      | LEUM_RS05680                           | K00800  | 3-phosphoshikimate 1-carboxyvinyltransferase   |
| <i>aroC</i>           |               |                               | LBUCD034_RS01340             |                              |                             | LAF_RS06365                      | lp_2037                       | L0059                      | LEUM_RS05685                           | K01736  | Chorismate synthase                            |
| <i>pheA</i>           |               |                               |                              |                              |                             | LAF_RS06370                      |                               |                            |                                        | K14170  | Chorismate mutase / prephenate dehydratase     |
| <i>ARO11 aroA</i>     |               |                               | LBUCD034_RS01335             |                              | CG419_RS01860               |                                  |                               | L64445                     |                                        | K04516  | Chorismate mutase                              |
| <i>pheB</i>           |               |                               | LBUCD034_RS11680             |                              |                             |                                  |                               |                            |                                        | K06209  | Chorismate mutase                              |
| <i>tyrA2</i>          |               |                               | LBUCD034_RS01350             |                              |                             | LAF_RS06350                      | lp_2034                       | L0058                      | LEUM_RS05675                           | K04517  | Prephenate dehydrogenase                       |
| <i>aspB</i>           |               | LVIS_RS15700                  | LBUCD034_RS05885             | LBCZ_RS06920                 |                             | LAF_RS06085                      | lp_1739                       | L0098                      |                                        | K00812  | Aspartate aminotransferase                     |
| <i>aspB</i>           |               |                               |                              |                              |                             |                                  |                               |                            |                                        | K00812  | Aspartate aminotransferase                     |
| <i>hisC</i>           |               |                               | LBUCD034_RS03690             | LBCZ_RS06660                 | CG419_RS06545               | LAF_RS04495                      | lp_2551                       | L0065                      | LEUM_RS07570                           | K00817  | Histidinol-phosphate aminotransferase          |
| <i>tyrB</i>           |               |                               |                              | LBCZ_RS10030                 |                             |                                  |                               |                            |                                        | K00832  | Aromatic-amino-acid transaminase               |
| <b>Isoleucine</b>     |               |                               |                              |                              |                             |                                  |                               |                            |                                        |         |                                                |
| <i>ilvB ilvG ilvI</i> |               | LVIS_RS13945                  | LBUCD034_RS00260             | LBCZ_RS08845                 | CG419_RS05895               | LAF_RS05895                      | lp_3587                       | L210                       | LEUM_RS02545                           | K01652  | Acetolactate synthase I/II/III large subunit   |
| <i>ilvB ilvG ilvI</i> |               |                               | LBUCD034_RS11775             |                              |                             |                                  |                               | L0078                      | LEUM_RS09540                           | K01652  | Acetolactate synthase I/II/III large subunit   |

| Gene                               | Other name(s) | <i>Lb. brevis</i><br>ATCC 367 | <i>Lb. buchneri</i><br>CD034 | <i>Lb. casei</i><br>ATCC 393 | <i>Lb. curvatus</i><br>MRS6 | <i>Lb. fermentum</i><br>IFO 3956 | <i>Lb. plantarum</i><br>WCFS1 | <i>L. lactis</i><br>IL1403 | <i>Leu. mesenteroides</i><br>ATCC 8293 | KEGG ID          | Enzyme full name                                               |
|------------------------------------|---------------|-------------------------------|------------------------------|------------------------------|-----------------------------|----------------------------------|-------------------------------|----------------------------|----------------------------------------|------------------|----------------------------------------------------------------|
| <i>ihvH ivN</i>                    |               |                               |                              |                              |                             |                                  |                               | L0079                      | LEUM_RS09535                           | K01653           | Acetolactate synthase I/II small subunit                       |
| <i>ihvC</i>                        |               |                               |                              |                              |                             |                                  |                               | L0080                      | LEUM_RS09530                           | K00053           | Ketol-acid reductoisomerase                                    |
| <i>ihvD</i>                        |               |                               |                              |                              |                             |                                  |                               | L0077                      | LEUM_RS09930                           | K01687           | Dihydroxy-acid dehydratase                                     |
| <i>ihvE</i>                        |               |                               | LBUCD034_RS03635             | LBCZ_RS09375                 |                             | LAF_RS02015                      | lp_2390                       | L0086                      | LEUM_RS06440                           | K00826           | Branched-chain amino acid aminotransferase                     |
| <i>ihvE</i>                        |               |                               | LBUCD034_RS03640             |                              |                             | LAF_RS05355                      |                               |                            |                                        | K00826           | Branched-chain amino acid aminotransferase                     |
| <b>Valine</b>                      |               |                               |                              |                              |                             |                                  |                               |                            |                                        |                  |                                                                |
| <i>ihvB ihvG ihvI</i>              | LVIS_RS13945  |                               | LBUCD034_RS00260             | LBCZ_RS08845                 | CG419_RS05895               | LAF_RS05895                      | lp_3587                       | L210                       | LEUM_RS02545                           | K01652           | Acetolactate synthase I/II/III large subunit                   |
| <i>ihvB ihvG ihvI</i>              |               |                               | LBUCD034_RS11775             |                              |                             |                                  |                               | L0078                      | LEUM_RS09540                           | K01652           | Acetolactate synthase I/II/III large subunit                   |
| <i>ihvH ivN</i>                    |               |                               |                              |                              |                             |                                  |                               | L0079                      | LEUM_RS09535                           | K01653           | Acetolactate synthase I/II small subunit                       |
| <i>ihvC</i>                        |               |                               |                              |                              |                             |                                  |                               | L0080                      | LEUM_RS09530                           | K00053           | Ketol-acid reductoisomerase                                    |
| <i>ihvC</i>                        |               |                               |                              |                              |                             |                                  |                               |                            |                                        | K00053           | Ketol-acid reductoisomerase                                    |
| <i>ihvD</i>                        |               |                               |                              |                              |                             |                                  |                               | L0077                      | LEUM_RS09930                           | K01687           | Dihydroxy-acid dehydratase                                     |
| <i>ihvE</i>                        |               |                               | LBUCD034_RS03635             | LBCZ_RS09375                 |                             | LAF_RS02015                      | lp_2390                       | L0086                      | LEUM_RS06440                           | K00826           | Branched-chain amino acid aminotransferase                     |
| <i>ihvE</i>                        |               |                               | LBUCD034_RS03640             |                              |                             | LAF_RS05355                      |                               |                            |                                        | K00826           | Branched-chain amino acid aminotransferase                     |
| <b>Leucine</b>                     |               |                               |                              |                              |                             |                                  |                               |                            |                                        |                  |                                                                |
| <i>ihvB ihvG ihvI</i>              | LVIS_RS13945  |                               | LBUCD034_RS00260             | LBCZ_RS08845                 | CG419_RS05895               | LAF_RS05895                      | lp_3587                       | L210                       | LEUM_RS02545                           | K01652           | Acetolactate synthase I/II/III large subunit                   |
| <i>ihvB ihvG ihvI</i>              |               |                               | LBUCD034_RS11775             |                              |                             |                                  |                               | L0078                      | LEUM_RS09540                           | K01652           | Acetolactate synthase I/II/III large subunit                   |
| <i>ihvH ivN</i>                    |               |                               |                              |                              |                             |                                  |                               | L0079                      | LEUM_RS09535                           | K01653           | Acetolactate synthase I/II small subunit                       |
| <i>ihvC</i>                        |               |                               |                              |                              |                             |                                  |                               | L0080                      | LEUM_RS09530                           | K00053           | Ketol-acid reductoisomerase                                    |
| <i>ihvC</i>                        |               |                               |                              |                              |                             |                                  |                               |                            |                                        | K00053           | Ketol-acid reductoisomerase                                    |
| <i>ihvD</i>                        |               |                               |                              |                              |                             |                                  |                               | L0077                      | LEUM_RS09930                           | K01687           | Dihydroxy-acid dehydratase                                     |
| <i>leuA</i>                        |               |                               | LBUCD034_RS00335             |                              | CG419_RS09190               |                                  | lp_3476                       | L0077                      | LEUM_RS09890                           | K01649           | 2-isopropylmalate synthase                                     |
| <i>leuC</i>                        |               |                               |                              |                              |                             | LAF_RS05585                      |                               | L0075                      | LEUM_RS09880                           | K01703           | 3-isopropylmalate/(R)-2-methylmalate dehydratase large subunit |
| <i>leuD</i>                        |               |                               |                              |                              |                             | LAF_RS05580                      |                               | L0076                      | LEUM_RS09875                           | K01704           | 3-isopropylmalate/(R)-2-methylmalate dehydratase small subunit |
| <i>leuB</i>                        |               |                               |                              |                              |                             | LAF_RS05590                      |                               | L0074                      | LEUM_RS09885                           | K00052           | 3-isopropylmalate dehydrogenase                                |
| <i>ihvE</i>                        |               |                               | LBUCD034_RS03635             | LBCZ_RS09375                 |                             | LAF_RS02015                      | lp_2390                       | L0086                      | LEUM_RS06440                           | K00826           | Branched-chain amino acid aminotransferase                     |
| <i>ihvE</i>                        |               |                               | LBUCD034_RS03640             |                              |                             | LAF_RS05355                      |                               |                            |                                        | K00826           | Branched-chain amino acid aminotransferase                     |
| <b>Glutamate</b>                   |               |                               |                              |                              |                             |                                  |                               |                            |                                        |                  |                                                                |
| <i>gltB</i>                        |               |                               |                              |                              |                             |                                  |                               | L0119                      | LEUM_RS03985                           | K00265           | Glutamate synthase (NADPH) large chain                         |
| <i>gltD</i>                        |               |                               |                              |                              |                             |                                  |                               | L114827                    | LEUM_RS03990                           | K00266           | Glutamate synthase (NADPH) small chain                         |
| <i>glnA GLUL</i>                   | LVIS_RS16370  |                               | LBUCD034_RS06320             | LBCZ_RS07845                 | CG419_RS03570               | LAF_RS07240                      | lp_1581                       | L0118                      | LEUM_RS03495                           | K01915           | Glutamine synthetase                                           |
| <i>glnA GLUL</i>                   |               |                               |                              | LBCZ_RS02945                 |                             |                                  |                               |                            |                                        | K01915           | Glutamine synthetase                                           |
| <b>Proline</b>                     |               |                               |                              |                              |                             |                                  |                               |                            |                                        |                  |                                                                |
| <i>argJ</i>                        |               |                               | LBUCD034_RS09000             |                              |                             |                                  |                               | L0105                      | LEUM_RS00300                           | K00620           | Glutamate N-acetyltransferase / amino-acid N-acetyltransferase |
| <i>argB</i>                        |               |                               | LBUCD034_RS08995             |                              |                             | LAF_RS04255                      | lp_0530                       | L0107                      | LEUM_RS00295                           | K00930           | Acetylglutamate kinase                                         |
| <i>argC</i>                        |               |                               | LBUCD034_RS09005             |                              |                             | LAF_RS04265                      | lp_0487                       | L0104                      | LEUM_RS00305                           | K00145           | N-acetyl-gamma-glutamyl-phosphate reductase                    |
| <i>argD</i>                        |               |                               | LBUCD034_RS08990             |                              |                             | LAF_RS04250                      | lp_0531                       | L0106                      | LEUM_RS00290                           | K00818           | Acetylmethionine aminotransferase                              |
| <i>argE</i>                        |               |                               | LBUCD034_RS00425             |                              |                             |                                  |                               | L0115                      |                                        | K01438           | Acetylmethionine deacetylase                                   |
| <i>argE</i>                        |               |                               | LBUCD034_RS11875             |                              |                             | LAF_RS05385                      |                               | L01438                     |                                        | K01438           | Acetylmethionine deacetylase                                   |
| <i>ocd</i>                         |               |                               |                              |                              |                             | LAF_RS07660                      | lp_0016                       | K01750                     |                                        | K01750           | Ornithine cyclodeaminase                                       |
| <i>proB</i>                        |               |                               | LBUCD034_RS10125             | LBCZ_RS10930                 |                             | LAF_RS07660                      | lp_0016                       | L0117                      | LEUM_RS01420                           | K00931           | Glutamate 5-kinase                                             |
| <i>proA</i>                        |               |                               | LBUCD034_RS10130             | LBCZ_RS10925                 |                             | LAF_RS07655                      | lp_0017                       | L0116                      | LEUM_RS01425                           | K00147           | Glutamate-5-semialdehyde dehydrogenase                         |
| <i>proC</i>                        | LVIS_RS14165  |                               | LBUCD034_RS07595             | LBCZ_RS08665                 | CG419_RS02240               | LAF_RS07910                      | lp_0561                       | L135991                    | LEUM_RS09075                           | K00286           | Pyroline-5-carboxylate reductase                               |
| <b>Arginine</b>                    |               |                               |                              |                              |                             |                                  |                               |                            |                                        |                  |                                                                |
| <i>argJ</i>                        |               |                               | LBUCD034_RS09000             |                              |                             |                                  |                               | L0105                      | LEUM_RS00300                           | K00620           | Glutamate N-acetyltransferase / amino-acid N-acetyltransferase |
| <i>argB</i>                        |               |                               | LBUCD034_RS08995             |                              |                             | LAF_RS04255                      | lp_0530                       | L0107                      | LEUM_RS00295                           | K00930           | Acetylglutamate kinase                                         |
| <i>argC</i>                        |               |                               | LBUCD034_RS09005             |                              |                             | LAF_RS04265                      | lp_0487                       | L0104                      | LEUM_RS00305                           | K00145           | N-acetyl-gamma-glutamyl-phosphate reductase                    |
| <i>argD</i>                        |               |                               | LBUCD034_RS08990             |                              |                             | LAF_RS04250                      | lp_0531                       | L0106                      | LEUM_RS00290                           | K00818           | Acetylmethionine aminotransferase                              |
| <i>argE</i>                        |               |                               | LBUCD034_RS00425             |                              |                             |                                  |                               | L0115                      |                                        | K01438           | Acetylmethionine deacetylase                                   |
| <i>argE</i>                        |               |                               | LBUCD034_RS11875             |                              |                             | LAF_RS05385                      |                               | L01438                     |                                        | K01438           | Acetylmethionine deacetylase                                   |
| <i>OTC argF argI</i>               | LVIS_RS21430  |                               | LBUCD034_RS02395             |                              |                             | LAF_RS01760                      | lp_0532                       | L0108                      | LEUM_RS07120                           | K00611           | Ornithine carbamoyltransferase                                 |
| <i>OTC argF argI</i>               |               |                               |                              |                              |                             |                                  |                               | L0109                      |                                        | K00611           | Ornithine carbamoyltransferase                                 |
| <i>argG ASS1</i>                   |               |                               | LBUCD034_RS03905             | LBCZ_RS13220                 |                             | LAF_RS09265                      | lp_0775                       | L126739                    | LEUM_RS07130                           | K01940           | Argininosuccinate synthase                                     |
| <i>argH ASL</i>                    |               |                               | LBUCD034_RS03910             | LBCZ_RS13225                 |                             | LAF_RS09260                      | lp_0776                       | L0114                      | LEUM_RS07125                           | K01755           | Argininosuccinate lyase                                        |
| <i>rocF arg</i>                    |               |                               |                              |                              |                             | LAF_RS09330                      |                               |                            |                                        | K01476           | Arginase                                                       |
| <i>arcA</i>                        | LVIS_RS21435  |                               | LBUCD034_RS02390             |                              |                             | LAF_RS01770                      |                               | L0329                      |                                        | K01478           | Arginine deiminase                                             |
| <b>Putrescine</b>                  |               |                               |                              |                              |                             |                                  |                               |                            |                                        |                  |                                                                |
| <i>argJ</i>                        |               |                               | LBUCD034_RS09000             |                              |                             |                                  |                               | L0105                      | LEUM_RS00300                           | K00620           | Glutamate N-acetyltransferase / amino-acid N-acetyltransferase |
| <i>argB</i>                        |               |                               | LBUCD034_RS08995             |                              |                             | LAF_RS04255                      | lp_0530                       | L0107                      | LEUM_RS00295                           | K00930           | Acetylglutamate kinase                                         |
| <i>argC</i>                        |               |                               | LBUCD034_RS09005             |                              |                             | LAF_RS04265                      | lp_0487                       | L0104                      | LEUM_RS00305                           | K00145           | N-acetyl-gamma-glutamyl-phosphate reductase                    |
| <i>argD</i>                        |               |                               | LBUCD034_RS08990             |                              |                             | LAF_RS04250                      | lp_0531                       | L0106                      | LEUM_RS00290                           | K00818           | Acetylmethionine aminotransferase                              |
| <i>argE</i>                        |               |                               | LBUCD034_RS00425             |                              |                             |                                  |                               | L0115                      |                                        | K01438           | Acetylmethionine deacetylase                                   |
| <i>argE</i>                        |               |                               | LBUCD034_RS11875             |                              |                             | LAF_RS05385                      |                               | L01438                     |                                        | K01438           | Acetylmethionine deacetylase                                   |
| <i>ODC1 speC speF</i>              |               |                               |                              | LBCZ_RS07855                 |                             |                                  |                               |                            |                                        | K01581           | Ornithine decarboxylase                                        |
| <b>4-Aminobutanoate (GABA)</b>     |               |                               |                              |                              |                             |                                  |                               |                            |                                        |                  |                                                                |
| <i>gadB gadA GAD</i>               | LVIS_RS11930  |                               |                              |                              |                             |                                  | lp_3420                       | L123581                    |                                        | K01580           | Glutamate decarboxylase                                        |
| <i>gadB gadA GAD</i>               | LVIS_RS20565  |                               |                              |                              |                             |                                  |                               |                            |                                        | K01580           | Glutamate decarboxylase                                        |
| <b>Inosine monophosphate (IMP)</b> |               |                               |                              |                              |                             |                                  |                               |                            |                                        |                  |                                                                |
| <i>iktA iktB</i>                   | LVIS_RS18460  |                               |                              |                              |                             | LAF_RS09780                      | lp_0489<br>lp_1083            | L0043                      | LEUM_RS05705                           | K00615<br>K00615 | Transketolase<br>Transketolase                                 |

| Gene                                 | Other name(s) | <i>Lb. brevis</i><br>ATCC 367 | <i>Lb. buchneri</i><br>CD034 | <i>Lb. casei</i><br>ATCC 393 | <i>Lb. curvatus</i><br>MRS6 | <i>Lb. fermentum</i><br>IFO 3956 | <i>Lb. plantarum</i><br>WCFS1 | <i>L. lactis</i><br>IL1403 | <i>Leu. mesenteroides</i><br>ATCC 8293 | KEGG ID | Enzyme full name                                                               |
|--------------------------------------|---------------|-------------------------------|------------------------------|------------------------------|-----------------------------|----------------------------------|-------------------------------|----------------------------|----------------------------------------|---------|--------------------------------------------------------------------------------|
| <i>tkiA/ktb</i>                      |               |                               |                              |                              |                             |                                  | lp_3135                       |                            |                                        | K00615  | Transketolase                                                                  |
| <i>tkiA/ktb</i>                      |               |                               |                              |                              |                             |                                  | lp_3538                       |                            |                                        | K00615  | Transketolase                                                                  |
| <i>PRPS/prsA</i>                     | LVIS_RS13875  | LBUCD034_RS08065              | LBCZ_RS12200                 | CG419_RS01975                | LAF_RS01120                 |                                  | lp_0471                       | L25614                     | LEUM_RS03400                           | K00948  | Ribose-phosphate pyrophosphokinase                                             |
| <i>PRPS/prsA</i>                     |               |                               |                              |                              |                             |                                  | lp_2166                       |                            |                                        | K00948  | Ribose-phosphate pyrophosphokinase                                             |
| <i>purF/PPAT</i>                     |               | LBUCD034_RS01940              | LBCZ_RS08420                 | CG419_RS07140                | LAF_RS00690                 |                                  | lp_2723                       | L171350                    | LEUM_RS03530                           | K00764  | Amidophosphoribosyltransferase                                                 |
| <i>purD</i>                          |               | LBUCD034_RS01960              | LBCZ_RS08400                 | CG419_RS07120                | LAF_RS00710                 |                                  | lp_2719                       | L153005                    | LEUM_RS03415                           | K01945  | Phosphoribosylamine--glycine ligase                                            |
| <i>purN</i>                          |               | LBUCD034_RS01950              | LBCZ_RS08410                 | CG419_RS07130                | LAF_RS00700                 |                                  | lp_2721                       | L164626                    | LEUM_RS03540                           | K11175  | Phosphoribosylglycinamide formyltransferase 1                                  |
| <i>purT</i>                          |               |                               |                              |                              |                             |                                  |                               |                            |                                        | K08289  | Phosphoribosylglycinamide formyltransferase 2                                  |
| <i>purL/PEAS</i>                     |               | LBUCD034_RS01925              | LBCZ_RS08435                 | CG419_RS07155                | LAF_RS00675                 |                                  | lp_2726                       | L177031                    | LEUM_RS03515                           | K01952  | Phosphoribosylformylglycinamide synthase                                       |
| <i>purL/PEAS</i>                     |               | LBUCD034_RS01930              | LBCZ_RS08430                 | CG419_RS07150                | LAF_RS00680                 |                                  |                               |                            | LEUM_RS03520                           | K01952  | Phosphoribosylformylglycinamide synthase                                       |
| <i>purL/PEAS</i>                     |               | LBUCD034_RS01935              | LBCZ_RS08425                 | CG419_RS07145                | LAF_RS00685                 |                                  |                               |                            | LEUM_RS03525                           | K01952  | Phosphoribosylformylglycinamide synthase                                       |
| <i>purL/PEAS</i>                     |               |                               |                              |                              |                             |                                  | lp_2725                       | L176360                    |                                        | K01952  | Phosphoribosylformylglycinamide synthase                                       |
| <i>purL/PEAS</i>                     |               |                               |                              |                              |                             |                                  | lp_2724                       | L173921                    |                                        | K01952  | Phosphoribosylformylglycinamide synthase                                       |
| <i>purM</i>                          | LVIS_RS21965  | LBUCD034_RS01945              | LBCZ_RS08415                 | CG419_RS07135                | LAF_RS00695                 |                                  | lp_2722                       | L165202                    | LEUM_RS03545                           | K01933  | Phosphoribosylformylglycinamide cyclase                                        |
| <i>purM</i>                          |               | LBUCD034_RS11510              |                              |                              |                             |                                  |                               |                            |                                        | K01933  | Phosphoribosylformylglycinamide cyclase                                        |
| <i>purM</i>                          |               | LBUCD034_RS11590              |                              |                              |                             |                                  |                               |                            |                                        | K01933  | Phosphoribosylformylglycinamide cyclase                                        |
| <i>purM</i>                          |               |                               |                              |                              |                             |                                  |                               |                            | LEUM_RS03535                           | K01933  | Phosphoribosylformylglycinamide cyclase                                        |
| <i>purM</i>                          |               |                               |                              |                              |                             |                                  |                               |                            | LEUM_RS09635                           | K01933  | Phosphoribosylformylglycinamide cyclase                                        |
| <i>purK</i>                          | LVIS_RS19515  | LBUCD034_RS01915              | LBCZ_RS08445                 | CG419_RS02420                | LAF_RS00645                 |                                  | lp_2728                       | L151330                    | LEUM_RS03505                           | K01589  | 5-(carboxyamino)imidazole ribonucleotide synthase                              |
| <i>purK</i>                          |               | LBUCD034_RS08570              | LBCZ_RS05220                 |                              | LAF_RS08420                 |                                  |                               |                            |                                        | K01589  | 5-(carboxyamino)imidazole ribonucleotide synthase                              |
| <i>purK</i>                          |               | LBUCD034_RS01910              | LBCZ_RS08450                 | CG419_RS07170                | LAF_RS00640                 |                                  | lp_1141                       | L152487                    | LEUM_RS03500                           | K01589  | 5-(carboxyamino)imidazole ribonucleotide synthase                              |
| <i>purE</i>                          |               | LBUCD034_RS01920              | LBCZ_RS08440                 | CG419_RS07160                | LAF_RS00670                 |                                  | lp_2727                       | L177350                    | LEUM_RS03510                           | K01588  | 5-(carboxyamino)imidazole ribonucleotide mutase                                |
| <i>purC</i>                          |               |                               |                              |                              |                             |                                  |                               |                            |                                        | K01923  | Phosphoribosylaminoimidazole-succinocarboxamide synthase                       |
| <i>purB/ADL/</i>                     | LVIS_RS12650  | LBUCD034_RS02605              | LBCZ_RS05225                 | CG419_RS02425                | LAF_RS00650                 |                                  | lp_3269                       | L88187                     | LEUM_RS06785                           | K01756  | Adenylosuccinate lyase                                                         |
| <i>purH</i>                          |               | LBUCD034_RS01955              | LBCZ_RS08405                 | CG419_RS07125                | LAF_RS00705                 |                                  | lp_2720                       | L158710                    | LEUM_RS03545                           | K00602  | Phosphoribosylaminoimidazolecarboxamide formyltransferase / IMP cyclohydrolase |
| <b>Guanosine monophosphate (GMP)</b> | LVIS_RS18460  |                               |                              |                              |                             |                                  | LAF_RS09780                   | L0043                      | LEUM_RS05705                           | K00615  | Transketolase                                                                  |
| <i>tkiA/ktb</i>                      |               |                               |                              |                              |                             |                                  | lp_1083                       |                            |                                        | K00615  | Transketolase                                                                  |
| <i>tkiA/ktb</i>                      |               |                               |                              |                              |                             |                                  | lp_3135                       |                            |                                        | K00615  | Transketolase                                                                  |
| <i>tkiA/ktb</i>                      |               |                               |                              |                              |                             |                                  | lp_3538                       |                            |                                        | K00615  | Transketolase                                                                  |
| <i>PRPS/prsA</i>                     | LVIS_RS13875  | LBUCD034_RS08065              | LBCZ_RS12200                 | CG419_RS01975                | LAF_RS01120                 |                                  | lp_0471                       | L25614                     | LEUM_RS03400                           | K00948  | Ribose-phosphate pyrophosphokinase                                             |
| <i>PRPS/prsA</i>                     |               |                               |                              |                              |                             |                                  | lp_2166                       |                            |                                        | K00948  | Ribose-phosphate pyrophosphokinase                                             |
| <i>purF/PPAT</i>                     |               | LBUCD034_RS01940              | LBCZ_RS08420                 | CG419_RS07140                | LAF_RS00690                 |                                  | lp_2723                       | L171350                    | LEUM_RS03530                           | K00764  | Amidophosphoribosyltransferase                                                 |
| <i>purD</i>                          |               | LBUCD034_RS01960              | LBCZ_RS08400                 | CG419_RS07120                | LAF_RS00710                 |                                  | lp_2719                       | L153005                    | LEUM_RS03415                           | K01945  | Phosphoribosylamine--glycine ligase                                            |
| <i>purN</i>                          |               | LBUCD034_RS01950              | LBCZ_RS08410                 | CG419_RS07130                | LAF_RS00700                 |                                  | lp_2721                       | L164626                    | LEUM_RS03540                           | K11175  | Phosphoribosylglycinamide formyltransferase 1                                  |
| <i>purT</i>                          |               |                               |                              |                              |                             |                                  |                               |                            |                                        | K08289  | Phosphoribosylglycinamide formyltransferase 2                                  |
| <i>purL/PEAS</i>                     |               | LBUCD034_RS01925              | LBCZ_RS08435                 | CG419_RS07155                | LAF_RS00675                 |                                  | lp_2726                       | L177031                    | LEUM_RS03515                           | K01952  | Phosphoribosylformylglycinamide synthase                                       |
| <i>purL/PEAS</i>                     |               | LBUCD034_RS01930              | LBCZ_RS08430                 | CG419_RS07150                | LAF_RS00680                 |                                  |                               |                            | LEUM_RS03520                           | K01952  | Phosphoribosylformylglycinamide synthase                                       |
| <i>purL/PEAS</i>                     |               | LBUCD034_RS01935              | LBCZ_RS08425                 | CG419_RS07145                | LAF_RS00685                 |                                  |                               |                            | LEUM_RS03525                           | K01952  | Phosphoribosylformylglycinamide synthase                                       |
| <i>purL/PEAS</i>                     |               |                               |                              |                              |                             |                                  | lp_2725                       | L176360                    |                                        | K01952  | Phosphoribosylformylglycinamide synthase                                       |
| <i>purL/PEAS</i>                     |               |                               |                              |                              |                             |                                  | lp_2724                       | L173921                    |                                        | K01952  | Phosphoribosylformylglycinamide synthase                                       |
| <i>purM</i>                          | LVIS_RS21965  | LBUCD034_RS01945              | LBCZ_RS08415                 | CG419_RS07135                | LAF_RS00695                 |                                  | lp_2722                       | L165202                    | LEUM_RS03545                           | K01933  | Phosphoribosylformylglycinamide cyclase                                        |
| <i>purM</i>                          |               | LBUCD034_RS11510              |                              |                              |                             |                                  |                               |                            |                                        | K01933  | Phosphoribosylformylglycinamide cyclase                                        |
| <i>purM</i>                          |               | LBUCD034_RS11590              |                              |                              |                             |                                  |                               |                            |                                        | K01933  | Phosphoribosylformylglycinamide cyclase                                        |
| <i>purM</i>                          |               |                               |                              |                              |                             |                                  |                               |                            | LEUM_RS03535                           | K01933  | Phosphoribosylformylglycinamide cyclase                                        |
| <i>purM</i>                          |               |                               |                              |                              |                             |                                  |                               |                            | LEUM_RS09635                           | K01933  | Phosphoribosylformylglycinamide cyclase                                        |
| <i>purK</i>                          | LVIS_RS19515  | LBUCD034_RS01915              | LBCZ_RS08445                 | CG419_RS02420                | LAF_RS00645                 |                                  | lp_2728                       | L151330                    | LEUM_RS03505                           | K01589  | 5-(carboxyamino)imidazole ribonucleotide synthase                              |
| <i>purK</i>                          |               | LBUCD034_RS08570              | LBCZ_RS05220                 |                              | LAF_RS08420                 |                                  |                               |                            |                                        | K01589  | 5-(carboxyamino)imidazole ribonucleotide synthase                              |
| <i>purK</i>                          |               | LBUCD034_RS01910              | LBCZ_RS08450                 | CG419_RS07170                | LAF_RS00640                 |                                  | lp_1141                       | L152487                    | LEUM_RS03500                           | K01589  | 5-(carboxyamino)imidazole ribonucleotide synthase                              |
| <i>purE</i>                          |               | LBUCD034_RS01920              | LBCZ_RS08440                 | CG419_RS07160                | LAF_RS00670                 |                                  | lp_2727                       | L177350                    | LEUM_RS03510                           | K01588  | 5-(carboxyamino)imidazole ribonucleotide mutase                                |
| <i>purC</i>                          |               |                               |                              |                              |                             |                                  |                               |                            |                                        | K01923  | Phosphoribosylaminoimidazole-succinocarboxamide synthase                       |
| <i>purB/ADSL</i>                     | LVIS_RS12650  | LBUCD034_RS02605              | LBCZ_RS05225                 | CG419_RS02425                | LAF_RS00650                 |                                  | lp_3269                       | L88187                     | LEUM_RS06785                           | K01756  | Adenylosuccinate lyase                                                         |
| <i>purH</i>                          |               | LBUCD034_RS01955              | LBCZ_RS08405                 | CG419_RS07125                | LAF_RS00705                 |                                  | lp_2720                       | L158710                    | LEUM_RS03545                           | K00602  | Phosphoribosylaminoimidazolecarboxamide formyltransferase / IMP cyclohydrolase |
| <i>guaB</i>                          |               |                               | LBCZ_RS00770                 | CG419_RS08905                |                             |                                  | lp_3194                       | L21264                     | LEUM_RS03155                           | K00088  | IMP dehydrogenase                                                              |
| <i>guaB</i>                          | LVIS_RS21590  | LBUCD034_RS02930              |                              |                              | LAF_RS00435                 |                                  |                               |                            | LEUM_RS03160                           | K00088  | IMP dehydrogenase                                                              |
| <i>guaA</i>                          | LVIS_RS20130  | LBUCD034_RS09200              | LBCZ_RS09055                 | CG419_RS09980                |                             |                                  | lp_0914                       | L115968                    |                                        | K00088  | IMP dehydrogenase                                                              |
| <i>guaA</i>                          |               |                               |                              |                              |                             |                                  |                               |                            |                                        | K01951  | GMP synthase (glutamine-hydrolyzing)                                           |
| <i>guaA</i>                          | LVIS_RS22460  | LBUCD034_RS09335              | LBCZ_RS10310                 |                              | LAF_RS04890                 |                                  | lp_0073                       |                            | LEUM_RS03165                           | K01951  | GMP synthase (glutamine-hydrolyzing)                                           |
| <i>guaA</i>                          |               |                               |                              |                              |                             |                                  |                               |                            |                                        | K01951  | GMP synthase (glutamine-hydrolyzing)                                           |
| <b>Adenosine monophosphate (AMP)</b> | LVIS_RS18460  |                               |                              |                              |                             |                                  | LAF_RS09780                   | L0043                      | LEUM_RS05705                           | K00615  | Transketolase                                                                  |
| <i>tkiA/ktb</i>                      |               |                               |                              |                              |                             |                                  | lp_1083                       |                            |                                        | K00615  | Transketolase                                                                  |
| <i>tkiA/ktb</i>                      |               |                               |                              |                              |                             |                                  | lp_3135                       |                            |                                        | K00615  | Transketolase                                                                  |
| <i>tkiA/ktb</i>                      |               |                               |                              |                              |                             |                                  | lp_3538                       |                            |                                        | K00615  | Transketolase                                                                  |
| <i>PRPS/prsA</i>                     | LVIS_RS13875  | LBUCD034_RS08065              | LBCZ_RS12200                 | CG419_RS01975                | LAF_RS01120                 |                                  | lp_0471                       | L25614                     | LEUM_RS03400                           | K00948  | Ribose-phosphate pyrophosphokinase                                             |
| <i>PRPS/prsA</i>                     |               |                               |                              |                              |                             |                                  | lp_2166                       |                            |                                        | K00948  | Ribose-phosphate pyrophosphokinase                                             |
| <i>purF/PPAT</i>                     |               | LBUCD034_RS01940              | LBCZ_RS08420                 | CG419_RS07140                | LAF_RS00690                 |                                  | lp_2723                       | L171350                    | LEUM_RS03530                           | K00764  | Amidophosphoribosyltransferase                                                 |

| Gene             | Other name(s) | <i>Lb. brevis</i><br>ATCC 367 | <i>Lb. buchneri</i><br>CD034 | <i>Lb. casei</i><br>ATCC 393 | <i>Lb. curvatus</i><br>MRS6 | <i>Lb. fermentum</i><br>IFO 3956 | <i>Lb. plantarum</i><br>WCFS1 | <i>L. lactis</i><br>IL1403 | <i>Leu. mesenteroides</i><br>ATCC 8293 | KEGG ID | Enzyme full name                                                               |
|------------------|---------------|-------------------------------|------------------------------|------------------------------|-----------------------------|----------------------------------|-------------------------------|----------------------------|----------------------------------------|---------|--------------------------------------------------------------------------------|
| <i>purD</i>      |               |                               | LBUCD034_RS01960             | LBCZ_RS08400                 | CG419_RS07120               | LAF_RS00710                      | lp_2719                       | L153005                    | LEUM_RS03415                           | K01945  | Phosphoribosylamine--glycine ligase                                            |
| <i>purN</i>      |               |                               | LBUCD034_RS01950             | LBCZ_RS08410                 | CG419_RS07130               | LAF_RS00700                      | lp_2721                       | L164626                    | LEUM_RS03540                           | K11175  | Phosphoribosylglycinamide formyltransferase 1                                  |
| <i>purT</i>      |               |                               |                              |                              |                             |                                  |                               |                            |                                        | K08289  | Phosphoribosylglycinamide formyltransferase 2                                  |
| <i>purL,PFAS</i> |               |                               |                              |                              |                             |                                  |                               | L177031                    |                                        | K01952  | Phosphoribosylformylglycinamide synthase                                       |
| <i>purL,PFAS</i> |               |                               | LBUCD034_RS01925             | LBCZ_RS08435                 | CG419_RS07155               | LAF_RS00675                      | lp_2726                       |                            | LEUM_RS03515                           | K01952  | Phosphoribosylformylglycinamide synthase                                       |
| <i>purL,PFAS</i> |               |                               | LBUCD034_RS01930             | LBCZ_RS08430                 | CG419_RS07150               | LAF_RS00680                      |                               |                            | LEUM_RS03520                           | K01952  | Phosphoribosylformylglycinamide synthase                                       |
| <i>purL,PFAS</i> |               |                               | LBUCD034_RS01935             | LBCZ_RS08425                 | CG419_RS07145               | LAF_RS00685                      |                               |                            | LEUM_RS03525                           | K01952  | Phosphoribosylformylglycinamide synthase                                       |
| <i>purL,PFAS</i> |               |                               |                              |                              |                             |                                  | lp_2725                       | L176360                    |                                        | K01952  | Phosphoribosylformylglycinamide synthase                                       |
| <i>purL,PFAS</i> |               |                               |                              |                              |                             |                                  | lp_2724                       | L173921                    |                                        | K01952  | Phosphoribosylformylglycinamide synthase                                       |
| <i>purL,PFAS</i> |               |                               |                              |                              |                             |                                  | lp_2722                       | L165202                    |                                        | K01933  | Phosphoribosylformylglycinamide synthase                                       |
| <i>purM</i>      |               |                               | LBUCD034_RS01945             | LBCZ_RS08415                 | CG419_RS07135               | LAF_RS00695                      |                               |                            |                                        | K01933  | Phosphoribosylformylglycinamide synthase                                       |
| <i>purM</i>      |               |                               | LBUCD034_RS11510             |                              |                             |                                  |                               |                            |                                        | K01933  | Phosphoribosylformylglycinamide synthase                                       |
| <i>purM</i>      |               | LVIS_RS21965                  | LBUCD034_RS11590             |                              |                             |                                  |                               |                            |                                        | K01933  | Phosphoribosylformylglycinamide synthase                                       |
| <i>purM</i>      |               |                               |                              |                              |                             |                                  |                               |                            | LEUM_RS03535                           | K01933  | Phosphoribosylformylglycinamide synthase                                       |
| <i>purM</i>      |               |                               |                              |                              |                             |                                  |                               |                            | LEUM_RS09635                           | K01933  | Phosphoribosylformylglycinamide synthase                                       |
| <i>purM</i>      |               |                               |                              |                              |                             |                                  |                               |                            | LEUM_RS03505                           | K01589  | 5-(carboxyamino)imidazole ribonucleotide synthase                              |
| <i>purK</i>      |               |                               | LBUCD034_RS01915             | LBCZ_RS08445                 |                             | LAF_RS00645                      | lp_2728                       | L151330                    |                                        | K01589  | 5-(carboxyamino)imidazole ribonucleotide synthase                              |
| <i>purK</i>      |               |                               | LBUCD034_RS08570             | LBCZ_RS05220                 | CG419_RS02420               | LAF_RS08420                      |                               |                            |                                        | K01589  | 5-(carboxyamino)imidazole ribonucleotide synthase                              |
| <i>purK</i>      |               | LVIS_RS19515                  |                              |                              |                             |                                  | lp_1141                       |                            |                                        | K01589  | 5-(carboxyamino)imidazole ribonucleotide synthase                              |
| <i>purK</i>      |               |                               | LBUCD034_RS01910             | LBCZ_RS08450                 | CG419_RS07170               | LAF_RS00640                      | lp_2729                       | L152487                    | LEUM_RS03500                           | K01588  | 5-(carboxyamino)imidazole ribonucleotide mutase                                |
| <i>purE</i>      |               |                               | LBUCD034_RS01920             | LBCZ_RS08440                 | CG419_RS07160               | LAF_RS00670                      | lp_2727                       | L177350                    | LEUM_RS03510                           | K01923  | Phosphoribosylaminoimidazole-succinocarboxamide synthase                       |
| <i>purC</i>      |               |                               |                              |                              |                             |                                  |                               |                            |                                        |         | Phosphoribosylaminoimidazole-succinocarboxamide synthase                       |
| <i>purH</i>      |               |                               | LBUCD034_RS01955             | LBCZ_RS08405                 | CG419_RS07125               | LAF_RS00705                      | lp_2720                       | L158710                    | LEUM_RS03545                           | K00602  | Phosphoribosylaminoimidazolecarboxamide formyltransferase / IMP cyclohydrolase |
| <i>purA</i>      |               |                               | LBUCD034_RS02600             | LBCZ_RS00310                 | CG419_RS00340               | LAF_RS00225                      | lp_3270                       | L12179                     |                                        | K01939  | Adenylosuccinate synthase                                                      |
| <i>purA</i>      |               | LVIS_RS12645                  |                              |                              |                             |                                  |                               |                            | LEUM_RS07135                           | K01939  | Adenylosuccinate synthase                                                      |
| <i>purB</i>      |               |                               | LBUCD034_RS02605             | LBCZ_RS05225                 | CG419_RS02425               | LAF_RS00650                      | lp_3269                       | L88187                     | LEUM_RS06785                           | K01756  | Adenylosuccinate lyase                                                         |
| <i>purB</i>      |               | LVIS_RS12650                  | LBUCD034_RS02175             |                              |                             |                                  |                               |                            |                                        | K01756  | Adenylosuccinate lyase                                                         |
